# Supplementary material for: Bio-based vitrimers from divanillic acid and epoxidized soybean oil
Source: Royal Society of Chemistry journal article supplement (doi:10.1039/d2su00140c), 2023-01-01
Supplement: d2su00140c1.pdf [file d2su00140c1.pdf]

## Bio-based vitrimers from divanillic acid and epoxidized soybean oil

Yunfan Zhang, Yukiko Enomoto, Tadahisa Iwata\*

Department of Biomaterial Sciences, Graduate School of Agricultural and Life Sciences, The University of Tokyo, 1-1-1 Yayoi, Bunkyo-ku, Tokyo, 113-8657, Japan

Corresponding Author

\*E-mail: [atiwata@g.ecc.u-tokyo.ac.jp](mailto:atiwata@g.ecc.u-tokyo.ac.jp); Tel: +81-3-58415266; Fax: +81-3-5841-1304.

### Supplementary information

|                                                                                 |    |
|---------------------------------------------------------------------------------|----|
| S1 $^1\text{H}$ and $^{13}\text{C}$ NMR spectra of DVA and BuDVA.....           | 2  |
| S2 Swelling experiment.....                                                     | 3  |
| S3 FT-IR spectra of OHESO- <i>x</i> and BuESO- <i>x</i> vitrimers.....          | 4  |
| S4 As-measured DMA curves.....                                                  | 6  |
| S5 Fitting function of vitrimer films and evaluation of activation energy ..... | 6  |
| S6 Reprocessed vitrimer films.....                                              | 9  |
| S7 Shape memory property of OHESO-1.0 .....                                     | 10 |

*S1  $^1\text{H}$  and  $^{13}\text{C}$  NMR spectra of DVA and BuDVA*

$^1\text{H}$  NMR of DVA and BuDVA:

**DVA:**  $^1\text{H}$  NMR (500 MHz,  $\text{DMSO-}d_6$ )  $\delta$  12.54 (s, 2H), 9.33 (s, 2H), 7.46 (d,  $J = 2.0$  Hz, 2H), 7.42 (d,  $J = 2.0$  Hz, 2H), 3.89 (s, 6H).

**BuDVA:**  $^1\text{H}$  NMR (500 MHz,  $\text{DMSO-}d_6$ )  $\delta$  12.88 (s, 2H), 7.56 (d,  $J = 2.0$  Hz, 2H), 7.42 (d,  $J = 2.0$  Hz, 2H), 3.88 (s, 6H), 3.81 (t,  $J = 6.3$  Hz, 4H), 1.34 (p, 4H), 1.05 (h, 4H), 0.66 (t,  $J = 7.4$  Hz, 6H).

$^{13}\text{C}$  NMR spectrum of DVA:

**DVA:**  $^{13}\text{C}$  NMR (126 MHz,  $\text{DMSO-}d_6$ )  $\delta$  167.11 (C1), 148.28 (C2), 147.17 (C3), 125.40 (C4), 124.26 (C5), 120.52 (C6), 111.01 (C7), 55.83 (C8).

(The  $^{13}\text{C}$  NMR spectrum of BuDVA was reported in our previous study.<sup>1)</sup>)

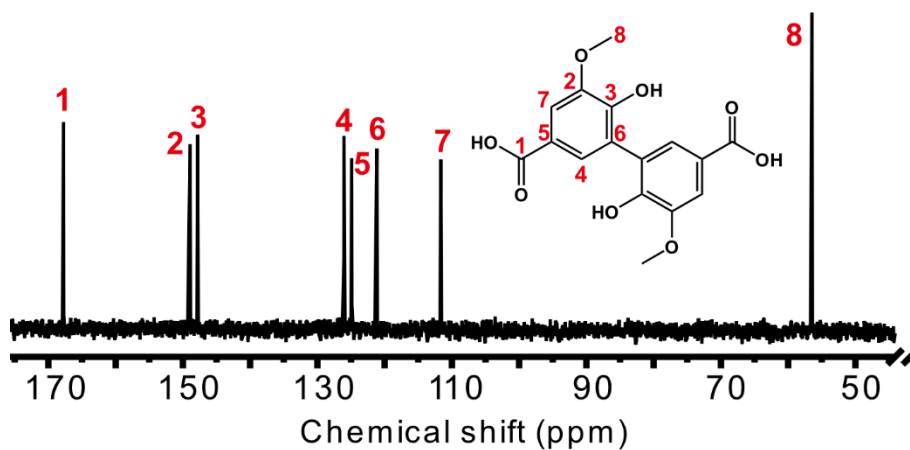

**Fig. S1**  $^{13}\text{C}$  NMR spectra of DVA in  $\text{DMSO-}d_6$ .

### *S2 Swelling experiment*

The swell ratios and gel contents of OHESO-*x* and BuESO-*x* were measured to evaluate the crosslinking densities of cured vitrimers. A solvent extraction method according to ASTM D2765-16 with THF as solvent was used. Cured vitrimer films (10 mm × 5 mm × 0.3 mm) were weighted as  $W_s$  and enveloped using metal mesh (weighted  $W_{s+m}$ ). The specimens were then immersed in THF, and the solvent was stirred and refluxed at 90 °C for 24 hours. After cooling to room temperature, the swollen specimens were removed from the solvent, wiped the THF on the surface, and then weighed ( $W_g$ ). The specimens were dried at 100 °C under vacuum until the weight reached a constant ( $W_d$ ). The swelling ratio and gel content can be given by:

$$\text{Swell ratio} = \left(1 + \frac{W_g - W_d}{W_d}\right) \times 100\%$$

$$\text{Gel content} = \left(1 - \frac{W_{s+m} - W_d}{W_s}\right) \times 100\%$$

**Table S1** Swell ratios and gel contents of cured vitrimer films

| Code             | Swelling ratio (%) | Gel content (%) |
|------------------|--------------------|-----------------|
| <b>OHESO-0.7</b> | 159.5 ± 17.9       | 81.4 ± 3.8      |
| <b>OHESO-1.0</b> | 154.9 ± 17.1       | 84.8 ± 2.3      |
| <b>OHESO-1.5</b> | 149.4 ± 17.2       | 80.4 ± 1.7      |
| <b>BuESO-0.7</b> | 165.8 ± 23.6       | 89.2 ± 1.9      |
| <b>BuESO-1.0</b> | 175.5 ± 18.5       | 94.2 ± 7.0      |
| <b>BuESO-1.5</b> | 146.5 ± 10.5       | 89.6 ± 1.1      |

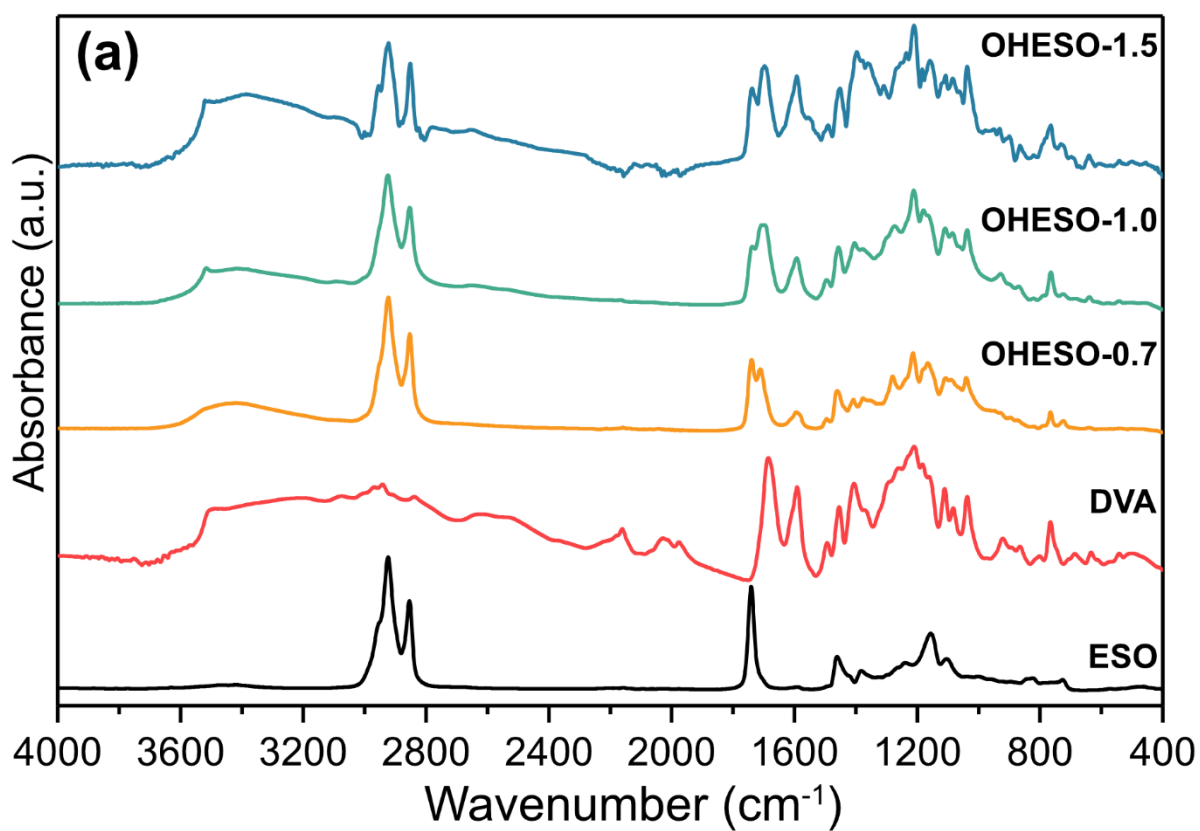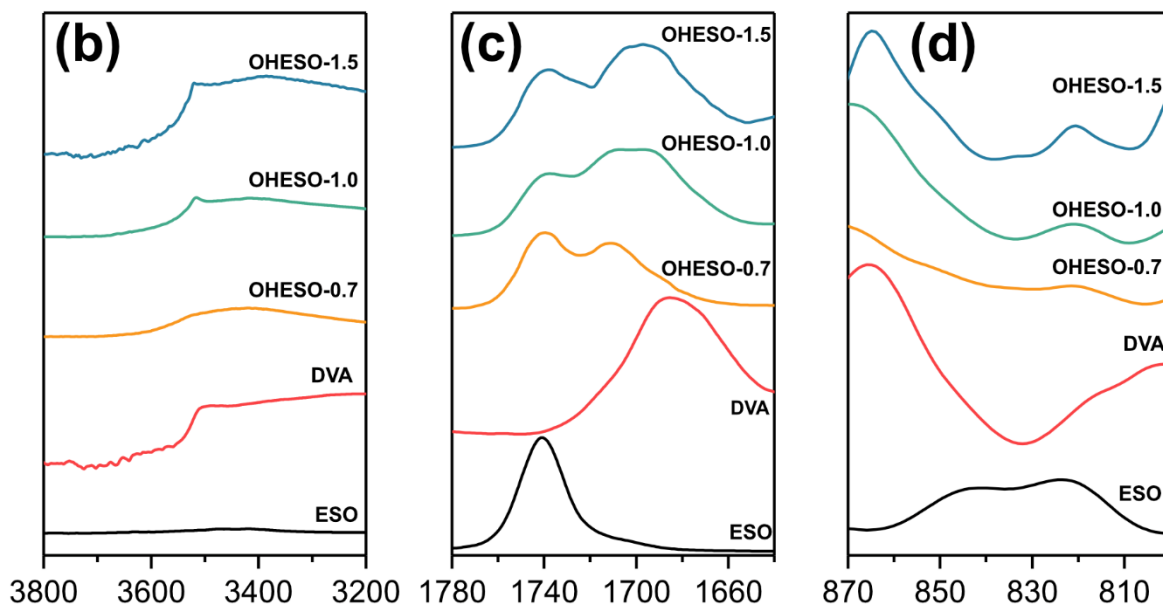

**Fig. S2** FT-IR spectra of ESO, DVA and OHESO-*x* vitrimers.

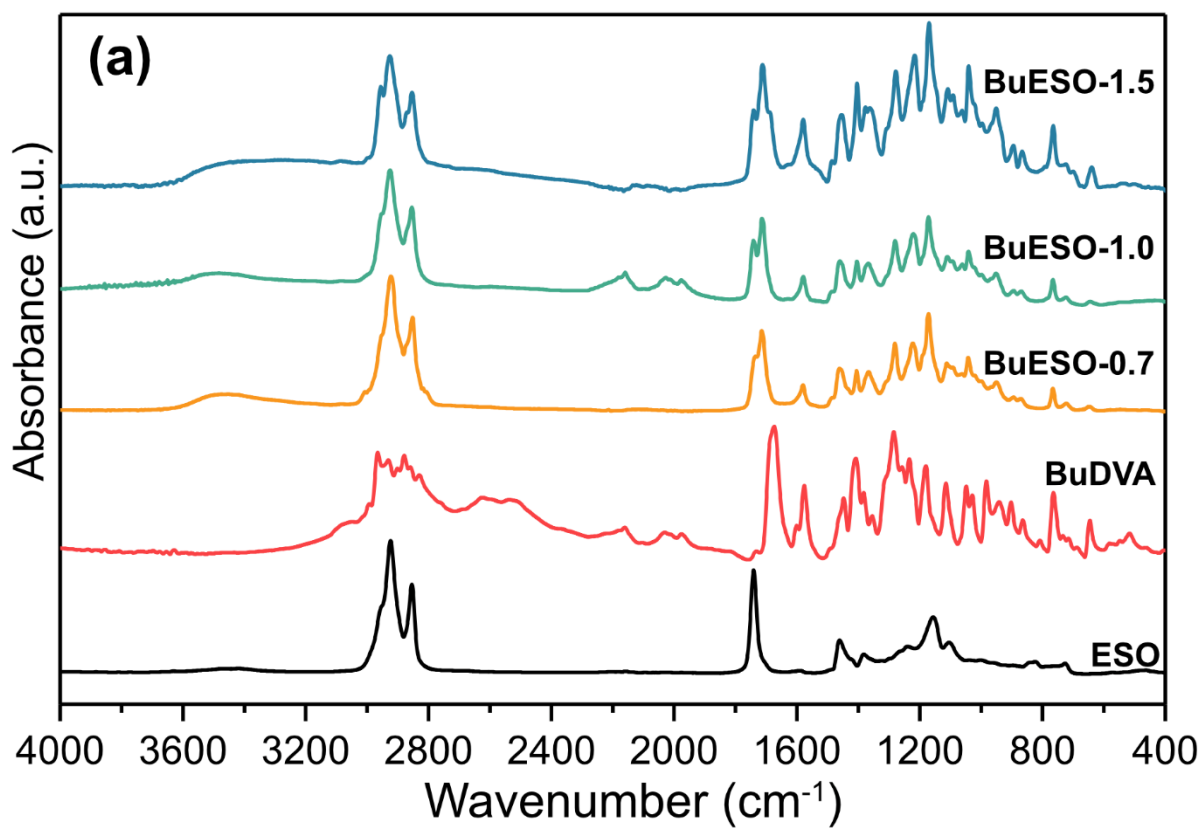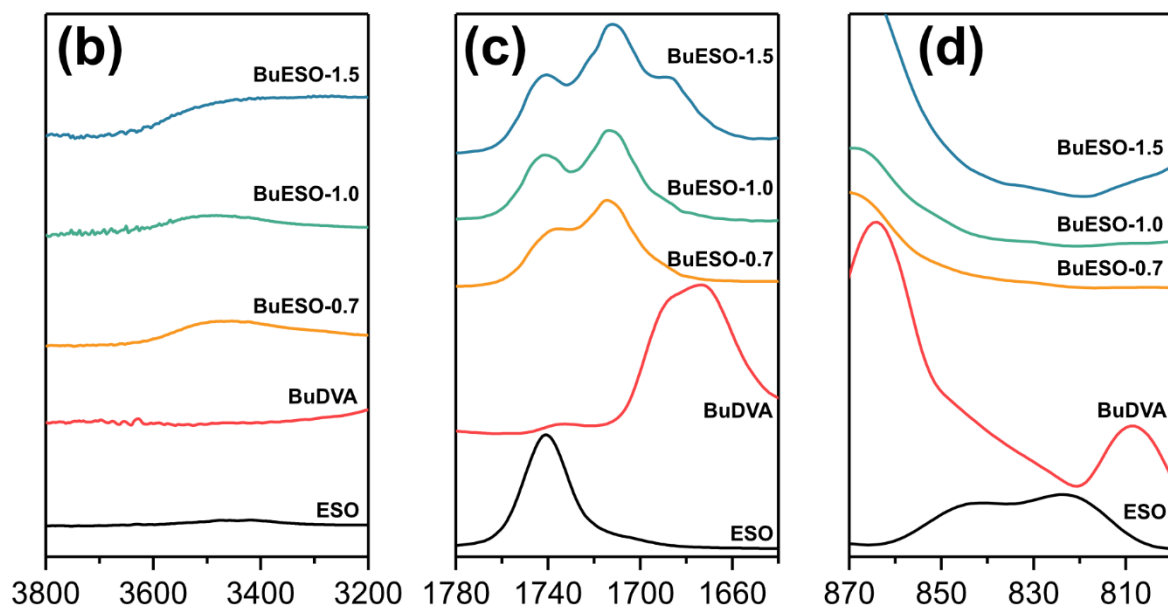

**Fig. S3** FT-IR spectra of ESO, BuDVA and BuESO-*x* vitrimers.

#### S4 As-measured DMA curves

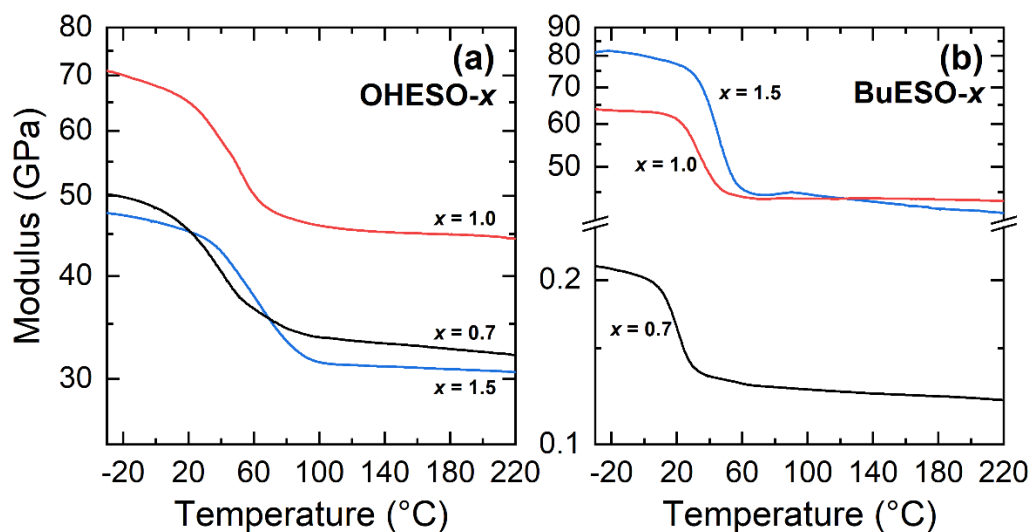

**Fig. S4** DMA curves of as-measured storage moduli versus temperatures at a heating rate of 3 °C/min.

#### S5 Fitting function of vitrimer films and evaluation of activation energy

According to several previous works<sup>2-4</sup>, the stress relaxation curves of OHESO-x and BuESO-x at each temperature (except for OHESO-1.0 at  $T = 190$  °C) were fitted by a stretched exponential function expressed as below,

$$G_t/G_0 = e^{\left(-\frac{t}{\tau_{\text{fit}}}\right)^\beta} + c$$

**Table S2** Values of  $\tau_{\text{fit}}$  and parameters of relaxation function

| Codes            | $T$ (°C) | $\tau_{\text{fit}}$ ( $10^3$ s) | Parameters |       |
|------------------|----------|---------------------------------|------------|-------|
|                  |          |                                 | $\beta$    | $c$   |
| <b>OHESO-1.0</b> | 170      | 36.3                            | 0.81       | -0.09 |
|                  | 180      | 25.3                            | 0.91       | -0.11 |
|                  | 190      | Not well fitted <sup>a</sup>    |            |       |
|                  | 200      | 5.6                             | 0.80       | -0.32 |
| <b>OHESO-0.7</b> | 200      | 21.9                            | 0.26       | 0.18  |
| <b>OHESO-1.5</b> | 200      | 40.1                            | 0.53       | -0.14 |
| <b>BuESO-1.0</b> | 170      | 221.9                           | 0.75       | -0.04 |
|                  | 180      | 180.4                           | 0.76       | -0.04 |
|                  | 190      | 76.4                            | 0.73       | -0.04 |
|                  | 200      | 30.2                            | 0.62       | -0.04 |
| <b>BuESO-0.7</b> | 200      | 6.4                             | 0.56       | 0.08  |
| <b>BuESO-1.5</b> | 200      | 82.0                            | 0.63       | -0.06 |

<sup>a</sup> The relaxation curve cannot be well fitted by the relaxation function.

The fitting curves are shown as follow.

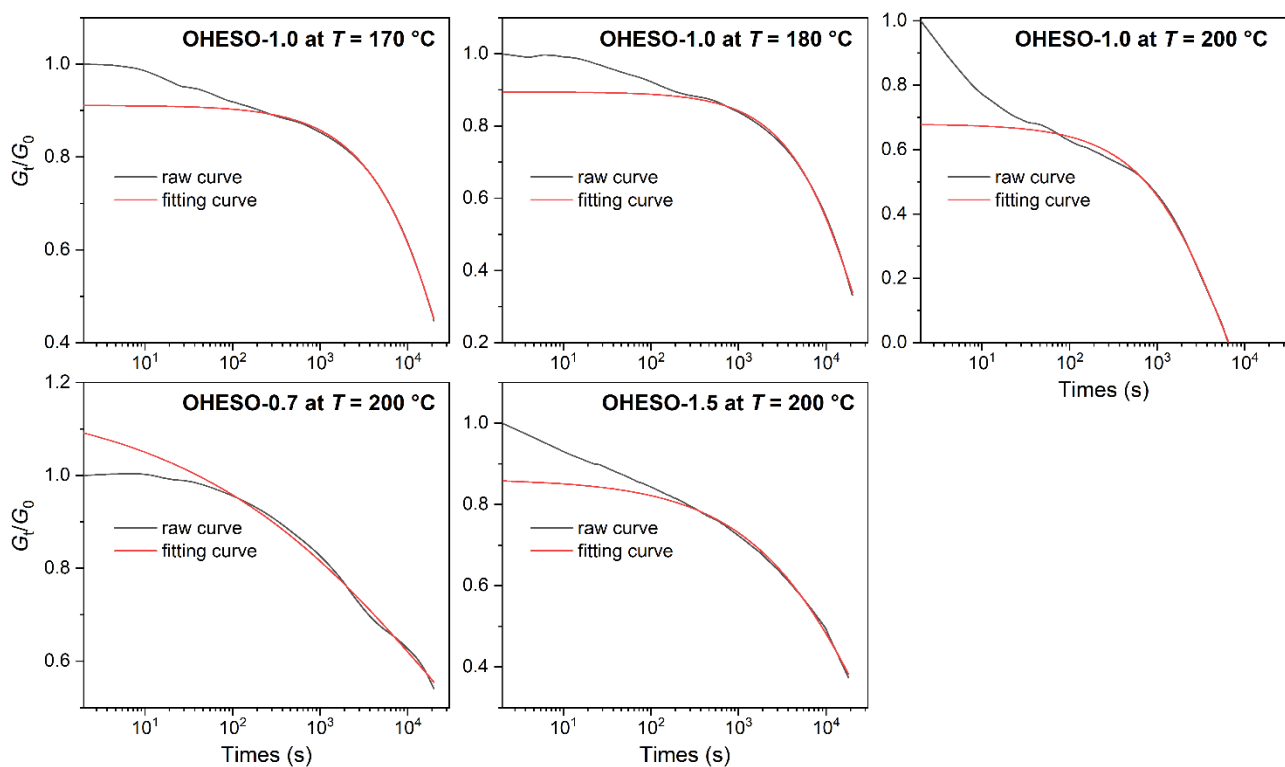

**Fig. S5** Normalized stress relaxation curves of OHESO-x and their fitting curves.

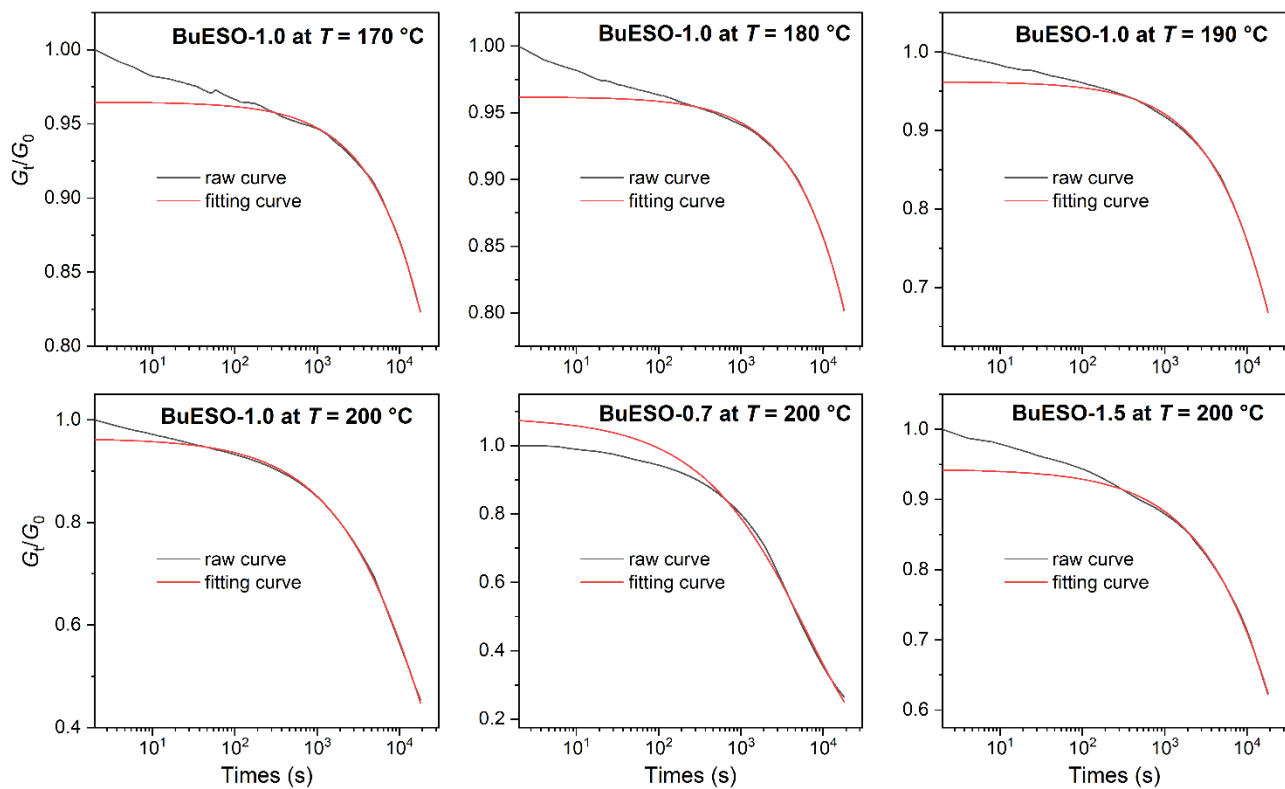

**Fig. S6** Normalized stress relaxation curves of BuESO-x and their fitting curves.

For OHESO-1.0 and BuESO-1.0, the values of  $\tau_{\text{fit}}$  at  $T = 170\text{--}200\text{ }^{\circ}\text{C}$  are substituted into the following Arrhenius equation (The  $R$  represents the ideal gas constant) to obtain the  $E_a$  value from the slope of the fitting line.

$$\ln(\tau_{\text{fit}}) = A + \frac{E_a}{RT}$$

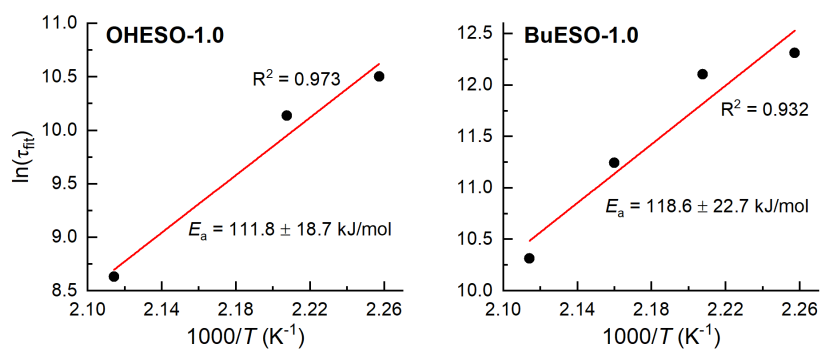

**Fig. S7** Arrhenius plot of the relaxation time for OHESO-1.0 and BuESO-1.0.

### S6 Reprocessed vitrimer films

**Table S3** Mechanical properties of reprocessed vitrimer films

| Sample           | Times of reprocessing | $\sigma_{\max}$ (MPa) | $\epsilon_{\max}$ (%) | $E$ (MPa)    |
|------------------|-----------------------|-----------------------|-----------------------|--------------|
| <b>OHESO-1.0</b> | 0 (pristine)          | $13.6 \pm 1.1$        | $13.6 \pm 2.0$        | $286 \pm 49$ |
|                  | 1                     | $10.1 \pm 1.4$        | $6.8 \pm 3.1$         | $228 \pm 30$ |
|                  | 2                     | $7.7 \pm 2.3$         | $12.7 \pm 10.7$       | $168 \pm 28$ |
|                  | 3                     | $8.8 \pm 0.9$         | $30.0 \pm 17.1$       | $199 \pm 24$ |
|                  | 4                     | $6.9 \pm 1.0$         | $19.2 \pm 7.9$        | $163 \pm 18$ |
|                  | 5                     | $8.6 \pm 0.5$         | $31.5 \pm 19.5$       | $174 \pm 23$ |
| <b>BuESO-1.0</b> | 0 (pristine)          | $4.8 \pm 0.6$         | $69 \pm 12$           | $57 \pm 11$  |
|                  | 1                     | $2.0 \pm 0.2$         | $63 \pm 10$           | $22 \pm 8$   |
|                  | 2                     | $2.5 \pm 0.2$         | $71 \pm 17$           | $29 \pm 14$  |
|                  | 3                     | $2.1 \pm 0.7$         | $54 \pm 16$           | $38 \pm 11$  |
|                  | 4                     | $2.6 \pm 0.6$         | $77 \pm 19$           | $30 \pm 8$   |
|                  | 5                     | $2.7 \pm 0.5$         | $50 \pm 17$           | $32 \pm 11$  |

### IR spectra of reprocessed vitrimer films

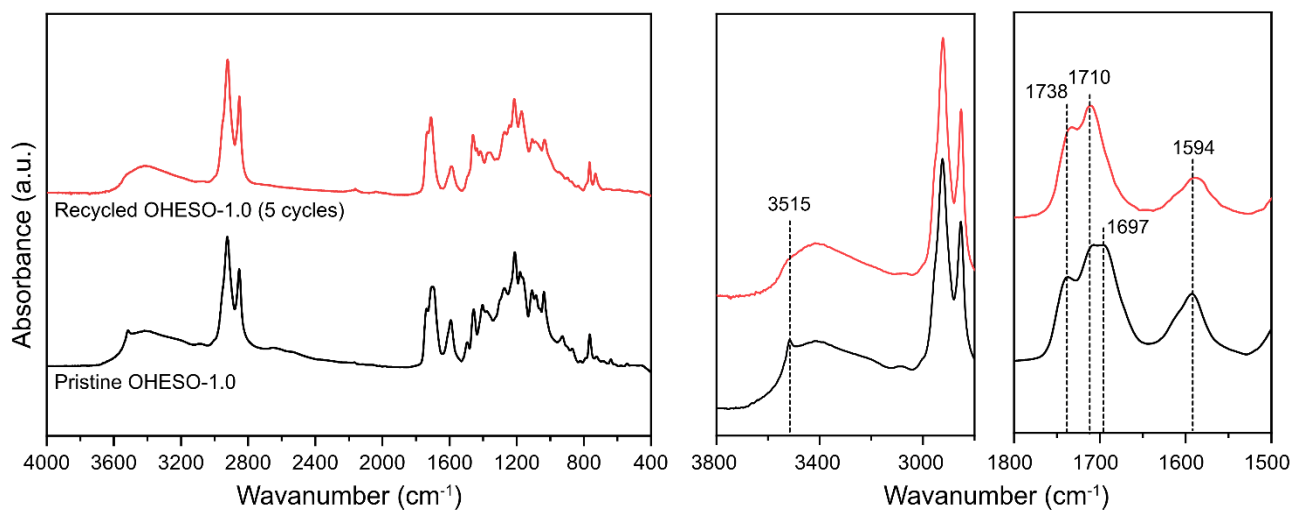

**Fig. S8** FT-IR spectra of pristine and recycled (5 cycles) OHESO-1.0.

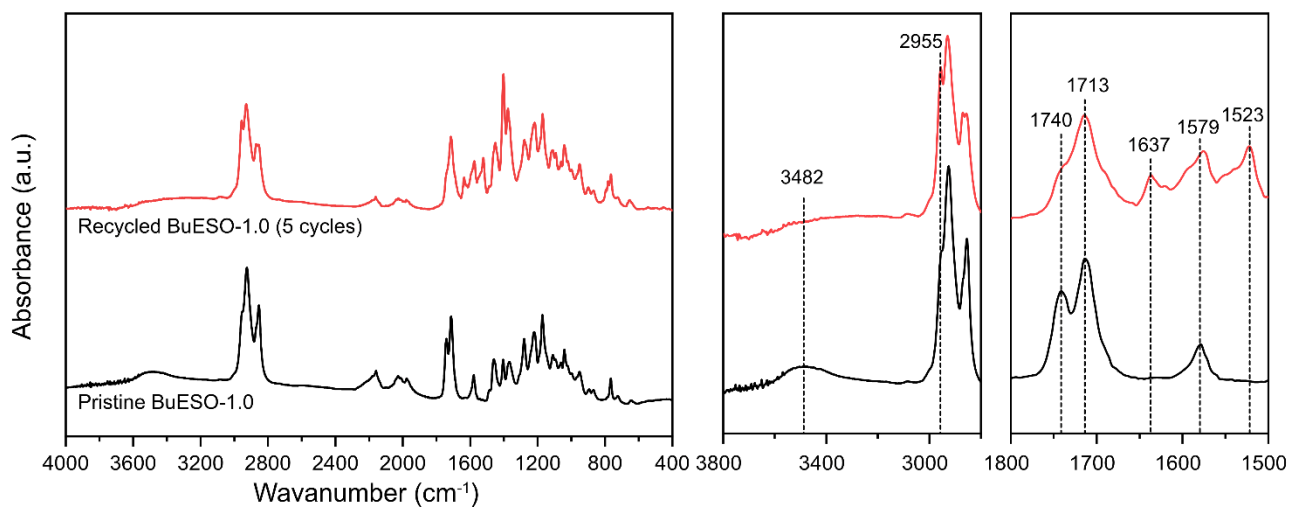

**Fig. S9** FT-IR spectra of pristine and recycled (5 cycles) BuESO-1.0.

### S7 Shape memory property of OHESO-1.0

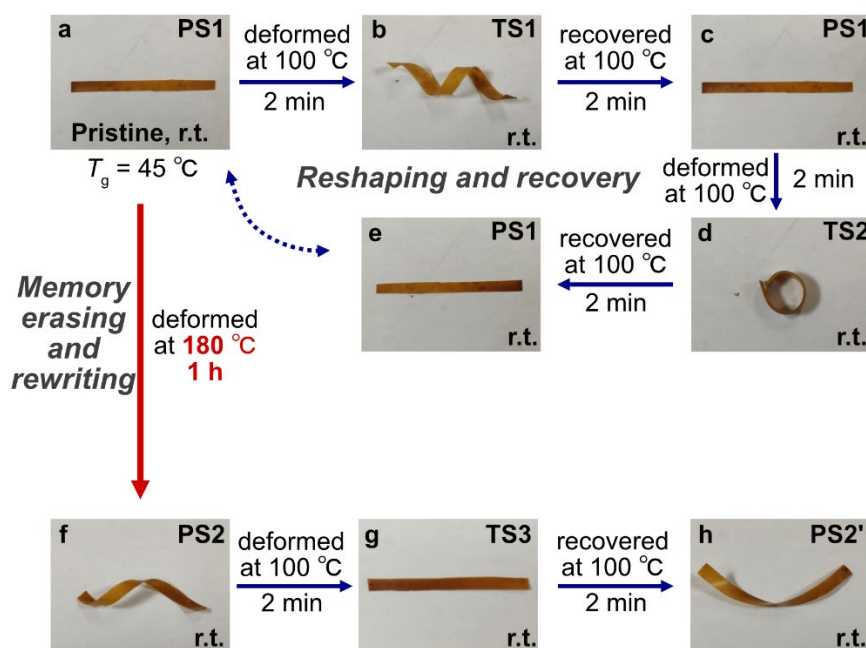

**Fig. S10** Shape memory photographs of OHESO-1.0. PS represents the permanent shapes (i.e., shapes in a stable state), and TS represents the temporary shapes (i.e., shapes in a metastable state). All images were taken at room temperature.

The shape memory behavior of OHESO-1.0 was studied as an example in a series of heating-and-reheating processes shown in Fig. S10. A strip of OHESO-1.0 [PS1, Fig. S10 (a)] was firstly cut from a vitrimer film. At this initial state, the molecular chains were in the conformation with high entropy (i.e., thermally stable).<sup>5</sup> Then, the specimen was heated at  $T = 100\text{ °C}$  (higher than its  $T_g$ ), and a force was applied to fix it in a helix shape

for 2 min. After cooling the reshaped specimens to room temperature and removing the force, a helical specimen was obtained (PS1, Fig. S10 (b)). At this state, the vitrimer was in a metastable stage because the molecular chains were frozen at  $T < T_g$  with relatively low entropy. After reheating the helical specimen to  $T = 100\text{ }^{\circ}\text{C}$ , the specimen recovered almost to its original shape (PS1) in 2 min. During the reheating (TS1 to PS1), the frozen molecular chains became movable, and the entropy increased. The following PS1→TS2→PS1 [Fig. S10 (c)–(e)] was a similar reshaping and recovery process to PS1→TS1→PS1. Furthermore, we re-edited the permanent shape of the specimen by heating the specimen at  $180\text{ }^{\circ}\text{C}$  for one hour [PS1→PS2, Fig. S10 (a) to (f)]. At  $T = 180\text{ }^{\circ}\text{C}$ , the transesterification was activated, and the networks of vitrimer were rearranged to form a new thermally stable permanent topology (PS2). As shown in [Fig. S10 (f) to (g)], although a complete shape recovery was not achieved, the specimen with re-edited permanent shape (PS2) also exhibited satisfactory shape memory behavior (PS2→TS3→PS2').

## Reference

1. Y. Enomoto and T. Iwata, *European Polymer Journal*, 2021, **154**, 110526.
2. K. S. Fancey, *Journal of Materials Science*, 2005, **40**, 4827-4831.
3. E. E. L. Maassen, J. P. A. Heuts and R. P. Sijbesma, *Polymer Chemistry*, 2021, **12**, 3640-3649.
4. Z. Song, Z. Wang and S. Cai, *Mechanics of Materials*, 2021, **153**, 103687.
5. T. Xie, *Polymer*, 2011, **52**, 4985-5000.
